# Supplementary material
Source: publisher site journal article supplement (https://www.dovepress.com/get_supplementary_file.php?f=404880.docx)
Supplement: Supplementary file 1 [file get_supplementary_file.php]

Appendix A1: Appraisal of study quality based on the ‘Quality Assessment Tool for Quantitative Studies’

| **Author** | **Selection bias** | | | **Study design** | | | | | **Confounders** | | | **Blinding** | | | **Data collection methods** | | |
| --- | --- | --- | --- | --- | --- | --- | --- | --- | --- | --- | --- | --- | --- | --- | --- | --- | --- |
|  | AQ1* | AQ2* | **rating** | BQ1* | BQ2* | BQ3* | BQ4* | **rating** | CQ1* | CQ2* | **rating** | DQ1* | DQ2* | **rating** | EQ1* | EQ2* | **rating** |
| Bae36 | 1 | 5 | moderate | 7 | 1 | / | / | weak | 1 | 1 | strong | n.a. | n.a. | n.a. | 1 | 1 | strong |
| Chiao26 | 1 | 5 | moderate | 5 | 1 | / | / | moderate | 1 | 2 | moderate | n.a. | n.a. | n.a. | 1 | 1 | strong |
| Correa37 | 2 | 5 | moderate | 7 | 1 | / | / | weak | 1 | 3 | weak | 3 | 3 | moderate | 1 | 1 | strong |
| Floud27 | 1 | 5 | moderate | 5 | 1 | / | / | moderate | 1 | 2 | moderate | n.a. | n.a. | n.a. | 1 | 1 | strong |
| Guiney38 | 3 | 5 | weak | 7 | 1 | / | / | weak | 1 | 2 | moderate | 3 | 3 | moderate | 1 | 1 | strong |
| Han34 | 1 | 5 | moderate | 5 | 1 | / | / | moderate | 1 | 2 | moderate | n.a. | n.a. | n.a. | 1 | 1 | strong |
| Kail28 | 1 | 5 | moderate | 5 | 1 | / | / | moderate | 1 | 1 | strong | n.a. | n.a. | n.a. | 1 | 1 | strong |
| Kim35 | 1 | 5 | moderate | 5 | 1 | / | / | moderate | 1 | 2 | moderate | n.a. | n.a. | n.a. | 1 | 1 | strong |
| Kim29 | 1 | 1 | strong | 5 | 1 | / | / | moderate | 1 | 1 | strong | n.a. | n.a. | n.a. | 1 | 1 | strong |
| Luo30 | 1 | 1 | strong | 5 | 1 | / | / | moderate | 1 | 2 | moderate | n.a. | n.a. | n.a. | 1 | 1 | strong |
| Park39 | 2 | 5 | moderate | 7 | 1 | / | / | weak | 1 | 3 | weak | 3 | 3 | moderate | 1 | 1 | strong |
| Proulx31 | 1 | 5 | moderate | 5 | 1 | / | / | moderate | 1 | 1 | strong | n.a. | n.a. | n.a. | 1 | 1 | strong |
| Sakurai32 | 2 | 5 | moderate | 3 | 1 | / | / | moderate | 2 | / | strong | 3 | 1 | weak | 1 | 1 | strong |
| Williams33 | 1 | 5 | moderate | 5 | 1 | / | / | moderate | 1 | 1 | strong | n.a. | n.a. | n.a. | 1 | 1 | strong |

*Note: *questions on the different components of study quality; n.a= not applicable*; *green= strong quality rating; yellow= moderate quality rating; red= weak quality rating*

Appendix A1 (Continued)

| **Author** | **Withdrawls and drop-outs** | | | **Intervention integrety** | | | | **Analyses** | | | | | **Global rating** |
| --- | --- | --- | --- | --- | --- | --- | --- | --- | --- | --- | --- | --- | --- |
|  | FQ1* | FQ2* | **rating** | GQ1* | GQ2* | GQ3* | **rating** | HQ1* | HQ2* | HQ3* | HQ4* | **rating** |  |
| Bae36 | 4 | 4 | moderate | n.a. | n.a. | n.a. | n.a. | n.a. | n.a. | 1 | 3 | moderate | **moderate** |
| Chiao26 | 3 | 3 | weak | n.a. | n.a. | n.a. | n.a. | n.a. | n.a. | 1 | 3 | moderate | **moderate** |
| Correa37 | 4 | 4 | moderate | n.a. | n.a. | n.a. | n.a. | n.a. | n.a. | 1 | 3 | moderate | **weak** |
| Floud27 | 3 | 3 | weak | n.a. | n.a. | n.a. | n.a. | n.a. | 4 | 1 | 3 | moderate | **moderate** |
| Guiney38 | 4 | 4 | moderate | n.a. | n.a. | n.a. | n.a. | n.a. | n.a. | 1 | 2 | weak | **weak** |
| Han34 | 3 | 3 | weak | n.a. | n.a. | n.a. | n.a. | n.a. | 4 | 1 | 2 | weak | **weak** |
| Kail28 | 3 | 3 | weak | n.a. | n.a. | n.a. | n.a. | n.a. | n.a. | 1 | 2 | weak | **weak** |
| Kim35 | 3 | 3 | weak | n.a. | n.a. | n.a. | n.a. | n.a. | n.a. | 1 | 2 | weak | **weak** |
| Kim29 | 3 | 3 | weak | n.a. | n.a. | n.a. | n.a. | n.a. | 2 | 1 | 3 | moderate | **moderate** |
| Luo30 | 3 | 3 | weak | n.a. | n.a. | n.a. | n.a. | n.a. | n.a. | 1 | 3 | moderate | **moderate** |
| Park39 | 4 | 4 | moderate | n.a. | n.a. | n.a. | n.a. | n.a. | n.a. | 1 | 1 | strong | **weak** |
| Proulx31 | 3 | 3 | weak | n.a. | n.a. | n.a. | n.a. | n.a. | 4 | 1 | 2 | weak | **weak** |
| Sakurai32 | 1 | 3 | weak | 3 | 1 | 5 | moderate | 4 | n.a. | 1 | 2 | weak | **weak** |
| Williams33 | 3 | 3 | weak | n.a. | n.a. | n.a. | n.a. | n.a. | 4 | 1 | 1 | strong | **moderate** |

*Note: *questions on the different components of study quality; n.a= not applicable*; *green= strong quality rating; yellow= moderate quality rating; red= weak quality rating*
